# Supplementary material for: Efficacy of Deep Brain Stimulation of the Ventral Anterior Limb of the Internal Capsule for Refractory Obsessive-Compulsive Disorder: A Clinical Cohort of 70 Patients
Source: Atypon-hosted journal article supplement (doi:10.1176/appi.ajp.2019.19060656), 2020-01-07
Supplement: appi.ajp.2019.19060656.ds001.pdf [file appi.ajp.2019.19060656.ds001.pdf]

**Supplement: Table S1. Number of patients reporting transient and permanent adverse events, N=70.**

| Complication or side effect                                     | Transient             |                         |                | Permanent             |                         |                |
|-----------------------------------------------------------------|-----------------------|-------------------------|----------------|-----------------------|-------------------------|----------------|
|                                                                 | <i>Likely related</i> | <i>Unlikely related</i> | <i>Unknown</i> | <i>Likely related</i> | <i>Unlikely related</i> | <i>Unknown</i> |
| <b>Surgery related</b>                                          |                       |                         |                |                       |                         |                |
| Hematoma lead                                                   | 1                     | 0                       | 0              | 0                     | 0                       | 0              |
| Liquor leakage                                                  | 2                     | 0                       | 0              | 0                     | 0                       | 0              |
| Malposition IPG (SAE)                                           | 2                     | 0                       | 0              | 0                     | 0                       | 0              |
| Malposition electrodes (SAE)                                    | 6                     | 0                       | 0              | 0                     | 0                       | 0              |
| Shift electrode                                                 | 1                     | 0                       | 0              | 0                     | 0                       | 0              |
| Wound infection                                                 | 4                     | 0                       | 0              | 0                     | 0                       | 0              |
| Infection IPG or electrodes (SAE)                               | 2                     | 0                       | 0              | 0                     | 0                       | 0              |
| Delirium                                                        | 2                     | 0                       | 0              | 0                     | 0                       | 0              |
| Pain around burr holes                                          | 11                    | 0                       | 0              | 1                     | 0                       | 0              |
| Pain around wounds                                              | 8                     | 0                       | 0              | 1                     | 0                       | 0              |
| Diplopia                                                        | 1                     | 0                       | 0              | 0                     | 0                       | 0              |
| Swollen eyes                                                    | 3                     | 0                       | 0              | 0                     | 0                       | 0              |
| <b>Device related</b>                                           |                       |                         |                |                       |                         |                |
| Feeling of IPG in chest                                         | 10                    | 0                       | 0              | 1                     | 0                       | 0              |
| Skin problems from device                                       | 2                     | 0                       | 0              | 4                     | 0                       | 0              |
| Feeling of electric current around IPG                          | 9                     | 0                       | 0              | 3                     | 0                       | 0              |
| Pulling of extension leads                                      | 16                    | 0                       | 0              | 5                     | 0                       | 0              |
| IPG erosion through the skin                                    | 1                     | 0                       | 0              | 1                     | 0                       | 0              |
| Other device related problems                                   | 3                     | 0                       | 1              | 0                     | 0                       | 0              |
| Pain around extensions                                          | 8                     | 0                       | 0              | 2                     | 0                       | 0              |
| Pain around IPG                                                 | 3                     | 0                       | 0              | 3                     | 0                       | 0              |
| <b>Stimulation related</b>                                      |                       |                         |                |                       |                         |                |
| Hypomanic symptoms                                              | 27                    | 0                       | 0              | 0                     | 0                       | 0              |
| Restlessness                                                    | 22                    | 0                       | 0              | 1                     | 0                       | 0              |
| Confusion                                                       | 3                     | 0                       | 0              | 0                     | 0                       | 0              |
| Agitation                                                       | 19                    | 0                       | 0              | 2                     | 0                       | 0              |
| Impulsivity                                                     | 11                    | 1                       | 1              | 0                     | 0                       | 0              |
| Disinhibition                                                   | 6                     | 0                       | 0              | 1                     | 0                       | 0              |
| Sleeping disorder                                               | 27                    | 0                       | 0              | 3                     | 2                       | 0              |
| Fatigue                                                         | 16                    | 0                       | 0              | 8                     | 1                       | 3              |
| Panic attacks                                                   | 1                     | 0                       | 1              | 0                     | 0                       | 1              |
| Disorganized thinking (subjective)                              | 2                     | 0                       | 0              | 0                     | 0                       | 0              |
| Executive functioning disorder (subjective)                     | 1                     | 0                       | 0              | 0                     | 0                       | 0              |
| Problems with concentrating (subjective)                        | 2                     | 0                       | 0              | 1                     | 0                       | 0              |
| Memory problems including difficulty finding words (subjective) | 6                     | 1                       | 2              | 8                     | 0                       | 0              |
| Urge to press hand against implantation site IPG                | 1                     | 0                       | 0              | 1                     | 0                       | 0              |
| Dizziness                                                       | 2                     | 0                       | 0              | 0                     | 0                       | 0              |
| Problems with balance                                           | 1                     | 0                       | 1              | 0                     | 0                       | 0              |
| Change in taste                                                 | 3                     | 0                       | 0              | 0                     | 0                       | 0              |
| Hypertension                                                    | 1                     | 1                       | 0              | 0                     | 1                       | 0              |
| Dyspnoea                                                        | 1                     | 0                       | 0              | 0                     | 0                       | 0              |
| Palpitations                                                    | 3                     | 0                       | 0              | 0                     | 1                       | 1              |
| Weight gain                                                     | 1                     | 0                       | 0              | 1                     | 0                       | 0              |
| Weight loss                                                     | 1                     | 0                       | 0              | 1                     | 0                       | 0              |

|                                                                  |    |   |   |   |   |   |
|------------------------------------------------------------------|----|---|---|---|---|---|
| Ear nose throat complaints (e.g. rhinitis, sinusitis)            | 1  | 1 | 2 | 0 | 0 | 0 |
| Neurological complaints (e.g. tremor, hypersensitivity to noise) | 3  | 0 | 0 | 0 | 0 | 0 |
| Pollakisuria                                                     | 0  | 0 | 1 | 2 | 0 | 0 |
| Incontinence                                                     | 1  | 0 | 0 | 0 | 0 | 0 |
| Nycturia                                                         | 1  | 0 | 0 | 0 | 0 | 0 |
| Intestinal complaints                                            | 1  | 1 | 0 | 0 | 0 | 0 |
| Stomach problems                                                 | 5  | 1 | 0 | 0 | 0 | 0 |
| Diarrhea                                                         | 0  | 2 | 0 | 0 | 0 | 0 |
| Nausea                                                           | 6  | 3 | 0 | 0 | 0 | 0 |
| Muscular complaints (e.g. cramps)                                | 3  | 1 | 0 | 0 | 0 | 0 |
| Other complaints eyes (e.g. bad night vision, irritation eyes)   | 2  | 0 | 0 | 1 | 0 | 0 |
| Restricted affect                                                | 1  | 0 | 0 | 0 | 0 | 0 |
| Anxiety                                                          | 1  | 0 | 0 | 0 | 0 | 0 |
| Depression                                                       | 2  | 1 | 1 | 0 | 0 | 0 |
| Mania                                                            | 1  | 0 | 0 | 0 | 0 | 0 |
| Hallucinations                                                   | 1  | 0 | 0 | 1 | 0 | 1 |
| Delusions                                                        | 1  | 0 | 0 | 0 | 0 | 0 |
| Flight of ideas                                                  | 3  | 0 | 1 | 0 | 1 | 0 |
| Suicidal thoughts                                                | 1  | 2 | 4 | 0 | 0 | 0 |
| Apathy                                                           | 1  | 0 | 0 | 0 | 0 | 0 |
| Derealization                                                    | 1  | 0 | 0 | 0 | 0 | 0 |
| Suicide attempt (SAE)                                            | 1  | 0 | 2 | 0 | 0 | 0 |
| Automutilation or intoxication                                   | 0  | 1 | 1 | 0 | 0 | 0 |
| Emotional lability                                               | 1  | 0 | 0 | 0 | 0 | 0 |
| Hypersalivation                                                  | 1  | 0 | 0 | 0 | 0 | 0 |
| Excessive transpiration                                          | 2  | 0 | 0 | 0 | 1 | 0 |
| Sexual complaints                                                | 2  | 1 | 0 | 0 | 0 | 0 |
| Changes in menstruation pattern                                  | 0  | 0 | 3 | 0 | 0 | 0 |
| Cold shivers                                                     | 2  | 0 | 0 | 0 | 0 | 0 |
| <b>Surgery, device of stimulation related</b>                    |    |   |   |   |   |   |
| Headache                                                         | 21 | 0 | 0 | 2 | 2 | 0 |
| Other pain complaints                                            | 5  | 0 | 0 | 1 | 0 | 0 |
| Paraesthesia                                                     | 12 | 0 | 0 | 2 | 0 | 0 |
